# Supplementary material
Source: PubMed Central journal article supplement (PMC6990762)

## Supplementary Online Content

Zhang A, Duchatelet S, Lakdawala N, et al. Targeted inhibition of the epidermal growth factor receptor and mammalian target of rapamycin signaling pathways in Olmsted syndrome. *JAMA Dermatol*. Published online January 2, 2020.  
doi:10.1001/jamadermatol.2019.4141

**eFigure 1.** Patient 1 Response to the mTOR Inhibitor Sirolimus

**eFigure 2.** Responses in Pain, Pruritus, and Quality of Life to the EGFR Inhibitor Erlotinib

This supplementary material has been provided by the authors to give readers additional information about their work.

**eFigure 1.** Patient 1 Response to the mTOR Inhibitor Sirolimus

A.

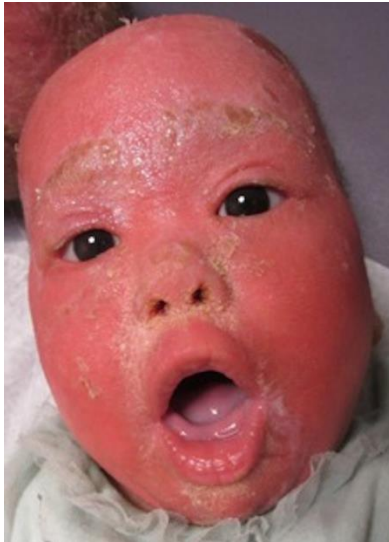

B.

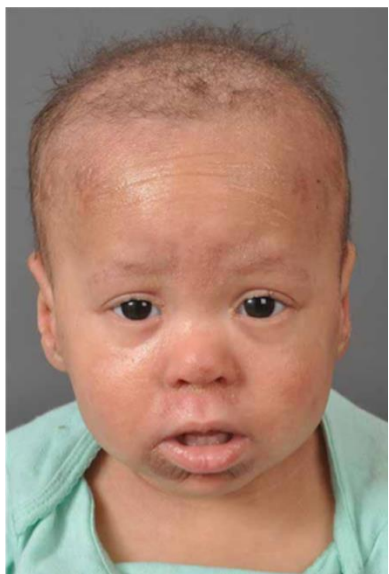

**eFigure 2.** Responses in Pain, Pruritus, and Quality of Life to the EGFR Inhibitor Erlotinib

A.

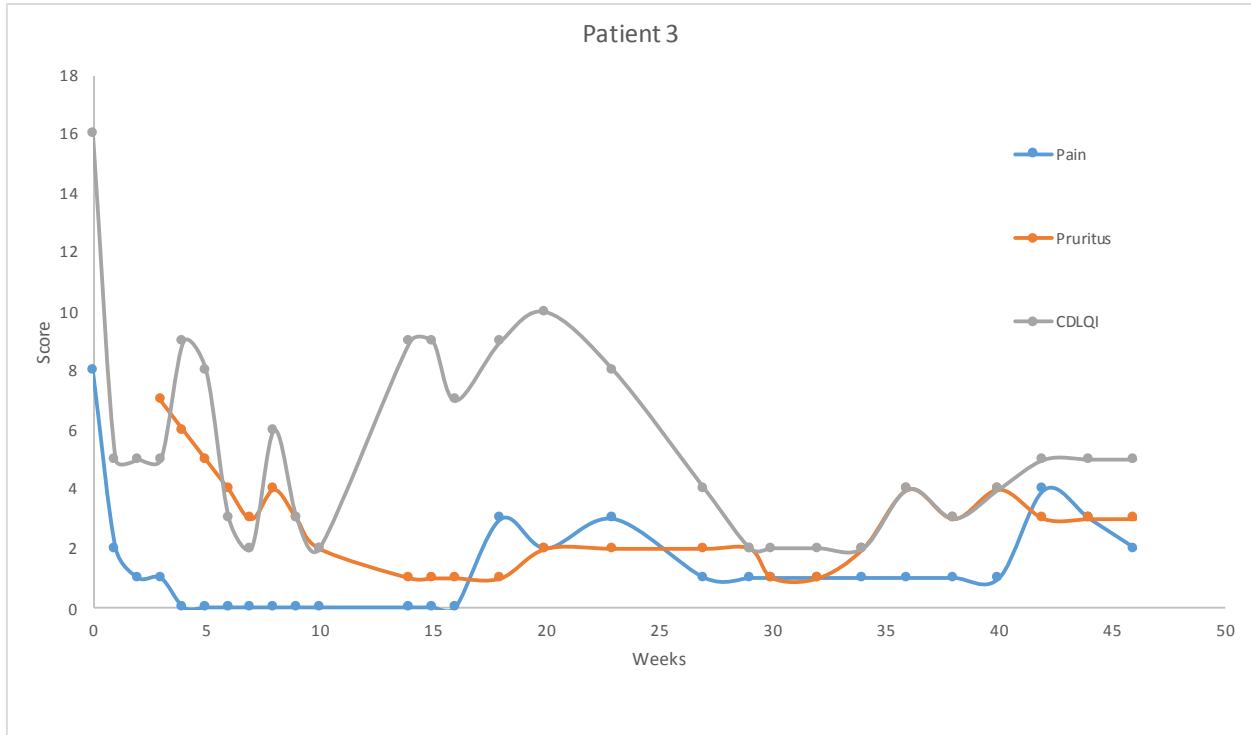

B.

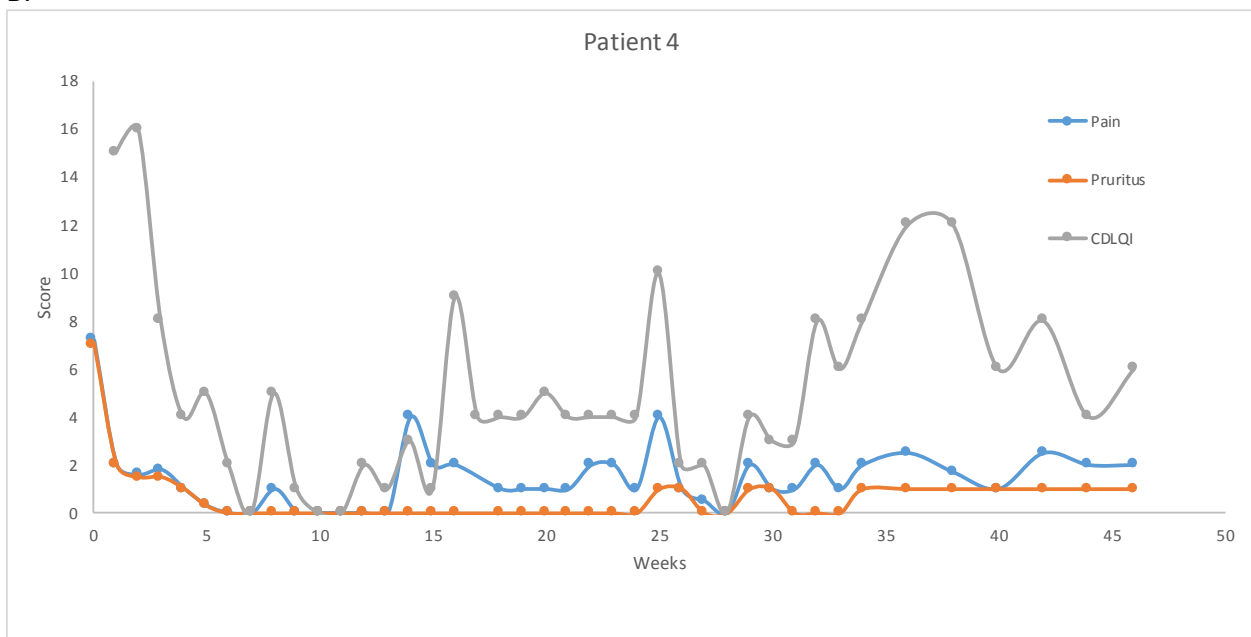

Supplement: jamadermatol-156-196-s001.pdf [file jamadermatol-156-196-s001.pdf]
